# Supplementary material for: Expression of AhDREB1, an AP2/ERF Transcription Factor Gene from Peanut, Is Affected by Histone Acetylation and Increases Abscisic Acid Sensitivity and Tolerance to Osmotic Stress in Arabidopsis
Source: PubMed Central journal article supplement (PMC5983730; doi:10.3390/ijms19051441), 2018-05-11
Supplement: ijms-19-01441-s001.pdf [file ijms-19-01441-s001.pdf]

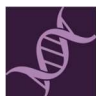

|               |                                                              |     |               |                                                             |      |
|---------------|--------------------------------------------------------------|-----|---------------|-------------------------------------------------------------|------|
| AhDREB1 .seq  | TTCCGACCAATGATGGTTTACAGACACACAGCTTGCATCTCAGATCCCTTTGCA       | 60  | AhDREB1 .seq  | CTTTCGACACTCAATTCCTCACTCCGCGCACAGCCGCTCCCTCCGCGGTGAC        | 705  |
| AcDREB2A .seq | TTCCGACCAATGATGGTTTACAGACACACAGCTTGCATCTCAGATCCCTTTGCA       | 60  | AcDREB2A .seq | TTGCGTCAGCCGAGTTTGAACAT...AACATTGTGGAGTGTATCTCGAAGAGAAAGGAA | 656  |
| AcDREB2B .seq | TTCCGACCAATGATGGTTTACAGACACACAGCTTGCATCTCAGATCCCTTTGCA       | 60  | AcDREB2B .seq | TTTCTGCTTAGAGTTTGAACAG...CACTATTGGGCGCAATCTCGAAGAGAAAGGAA   | 682  |
| GmDREB2 .seq  | TTCCGACCAATGATGGTTTACAGACACACAGCTTGCATCTCAGATCCCTTTGCA       | 60  | GmDREB2 .seq  | AGCATTTTCCGAAAGCTTACGCAACACAGCGAAGAGCCGCTGCTCCGCGAGAGCT     | 674  |
| OsDREB2 .seq  | TTCCGACCAATGATGGTTTACAGACACACAGCTTGCATCTCAGATCCCTTTGCA       | 60  | OsDREB2 .seq  | CTTTTGTGAGCGCGGAGAA...ATTGAGGATTTGGATCAGAGAGATCTCTTTA       | 678  |
| SlDREB2 .seq  | TTCCGACCAATGATGGTTTACAGACACACAGCTTGCATCTCAGATCCCTTTGCA       | 60  | SlDREB2 .seq  | AGCCGAGACAGCGACAGAGGCTTTCAGGAAAGATGAGACATTTACACTCTGACCTC    | 710  |
| EmDREB2 .seq  | TTCCGACCAATGATGGTTTACAGACACACAGCTTGCATCTCAGATCCCTTTGCA       | 60  | EmDREB2 .seq  | CGAGCCAGAGCCGAGCCATCTCTGATGTTGTGAAAGAAC...GACATGTTTCTGCT    | 699  |
| Consensus     | TTCCGACCAATGATGGTTTACAGACACACAGCTTGCATCTCAGATCCCTTTGCA       |     | Consensus     | TTGCGTCAGCCGAGTTTGAACAT...AACATTGTGGAGTGTATCTCGAAGAGAAAGGAA |      |
| AhDREB1 .seq  | GGTAGTGAATTAATGGAGCTCTTGAACCTTTATTAAGATTTCTTCCACACACCTTC     | 119 | AhDREB1 .seq  | TTGCGCGCTTACAGCCGCTTCACTCTCTCGACGCAAGCTTCAAGCCATTTGGCA      | 764  |
| AcDREB2A .seq | GGTAGTGAATTAATGGAGCTCTTGAACCTTTATTAAGATTTCTTCCACACACCTTC     | 120 | AcDREB2A .seq | ACAGAGAGCGTCAAGCGGATTTAGAGACCTTCAGCAGCAACAGCGGATTTCCCTGCT   | 716  |
| AcDREB2B .seq | GGTAGTGAATTAATGGAGCTCTTGAACCTTTATTAAGATTTCTTCCACACACCTTC     | 120 | AcDREB2B .seq | ACCGAAGCGTCAAGAGAGAGATACAGCAGCAGCAGCAGCAGCAGCAGCAGCAGCAGC   | 742  |
| GmDREB2 .seq  | GGTAGTGAATTAATGGAGCTCTTGAACCTTTATTAAGATTTCTTCCACACACCTTC     | 118 | GmDREB2 .seq  | GAAGCCGCTTATACAGCCTCTCGAGCTCGCAGCTCGCAGCTCGCAGCTCGCAGCT     | 734  |
| OsDREB2 .seq  | GGTAGTGAATTAATGGAGCTCTTGAACCTTTATTAAGATTTCTTCCACACACCTTC     | 114 | OsDREB2 .seq  | CACAAAGATTTACACATAAGTATGATTTATTGATGATTCCTGATGATTTGATGATG    | 738  |
| SlDREB2 .seq  | GGTAGTGAATTAATGGAGCTCTTGAACCTTTATTAAGATTTCTTCCACACACCTTC     | 120 | SlDREB2 .seq  | CTTCAAGAGTCAAGCGGAGATGAGCTTACCGCTCT...TAGATAGAGTGAAGCCTT    | 767  |
| EmDREB2 .seq  | GGTAGTGAATTAATGGAGCTCTTGAACCTTTATTAAGATTTCTTCCACACACCTTC     | 120 | EmDREB2 .seq  | GGCTTGAAGCCCTGCTTCTCTCGAGG...CTCGAGCCGCTCAAGTGA...CTT       | 747  |
| Consensus     | GGTAGTGAATTAATGGAGCTCTTGAACCTTTATTAAGATTTCTTCCACACACCTTC     |     | Consensus     | GGCTTGAAGCCCTGCTTCTCTCGAGG...CTCGAGCCGCTCAAGTGA...CTT       |      |
| AhDREB1 .seq  | ACCTTCACTCTCAGCTCTCTCTCTCTCTCTCTCTCTCTCTCTCTCTCTCTCTCTCT     | 178 | AhDREB1 .seq  | AGCCCTCGCGG...ATGCAAGAGCAGCGAAGAGCGGAGAGCAGCCGCTCCAAAG      | 821  |
| AcDREB2A .seq | ACCTTCACTCTCAGCTCTCTCTCTCTCTCTCTCTCTCTCTCTCTCTCTCTCTCTCT     | 163 | AcDREB2A .seq | TTGCAAC...GGATTTGCTTACTCTCTCTCTCTCTCTCTCTCTCTCTCTCTCTCTCT   | 800  |
| AcDREB2B .seq | ACCTTCACTCTCAGCTCTCTCTCTCTCTCTCTCTCTCTCTCTCTCTCTCTCTCTCT     | 162 | AcDREB2B .seq | CTTCAAC...GGATTTGCTTACTCTCTCTCTCTCTCTCTCTCTCTCTCTCTCTCTCT   | 800  |
| GmDREB2 .seq  | ACCTTCACTCTCAGCTCTCTCTCTCTCTCTCTCTCTCTCTCTCTCTCTCTCTCTCT     | 161 | GmDREB2 .seq  | CTTCAAC...GGATTTGCTTACTCTCTCTCTCTCTCTCTCTCTCTCTCTCTCTCTCT   | 791  |
| OsDREB2 .seq  | ACCTTCACTCTCAGCTCTCTCTCTCTCTCTCTCTCTCTCTCTCTCTCTCTCTCTCT     | 156 | OsDREB2 .seq  | CTTCAAC...GGATTTGCTTACTCTCTCTCTCTCTCTCTCTCTCTCTCTCTCTCTCT   | 798  |
| SlDREB2 .seq  | ACCTTCACTCTCAGCTCTCTCTCTCTCTCTCTCTCTCTCTCTCTCTCTCTCTCTCT     | 177 | SlDREB2 .seq  | CTTCAAC...GGATTTGCTTACTCTCTCTCTCTCTCTCTCTCTCTCTCTCTCTCTCT   | 798  |
| EmDREB2 .seq  | ACCTTCACTCTCAGCTCTCTCTCTCTCTCTCTCTCTCTCTCTCTCTCTCTCTCTCT     | 180 | EmDREB2 .seq  | CTTCAAC...GGATTTGCTTACTCTCTCTCTCTCTCTCTCTCTCTCTCTCTCTCTCT   | 827  |
| Consensus     | ACCTTCACTCTCAGCTCTCTCTCTCTCTCTCTCTCTCTCTCTCTCTCTCTCTCTCT     |     | Consensus     | CTTCAAC...GGATTTGCTTACTCTCTCTCTCTCTCTCTCTCTCTCTCTCTCTCTCT   |      |
| AhDREB1 .seq  | ACCTTCACTCTCAGCTCTCTCTCTCTCTCTCTCTCTCTCTCTCTCTCTCTCTCTCT     | 238 | AhDREB1 .seq  | AGCCCTCGCGG...ATGCAAGAGCAGCGAAGAGCGGAGAGCAGCCGCTCCAAAG      | 878  |
| AcDREB2A .seq | ACCTTCACTCTCAGCTCTCTCTCTCTCTCTCTCTCTCTCTCTCTCTCTCTCTCTCT     | 219 | AcDREB2A .seq | TTGTTGCGAGGCTCTCAAGCTTACCTTAAAGCCGCGCGGAGGAGCTGAG...CC      | 894  |
| AcDREB2B .seq | ACCTTCACTCTCAGCTCTCTCTCTCTCTCTCTCTCTCTCTCTCTCTCTCTCTCTCT     | 216 | AcDREB2B .seq | TTGTTGCGAGGCTCTCAAGCTTACCTTAAAGCCGCGCGGAGGAGCTGAG...CC      | 894  |
| GmDREB2 .seq  | ACCTTCACTCTCAGCTCTCTCTCTCTCTCTCTCTCTCTCTCTCTCTCTCTCTCTCT     | 218 | GmDREB2 .seq  | TTGTTGCGAGGCTCTCAAGCTTACCTTAAAGCCGCGCGGAGGAGCTGAG...CC      | 894  |
| OsDREB2 .seq  | ACCTTCACTCTCAGCTCTCTCTCTCTCTCTCTCTCTCTCTCTCTCTCTCTCTCTCT     | 210 | OsDREB2 .seq  | TTGTTGCGAGGCTCTCAAGCTTACCTTAAAGCCGCGCGGAGGAGCTGAG...CC      | 894  |
| SlDREB2 .seq  | ACCTTCACTCTCAGCTCTCTCTCTCTCTCTCTCTCTCTCTCTCTCTCTCTCTCTCT     | 231 | SlDREB2 .seq  | TTGTTGCGAGGCTCTCAAGCTTACCTTAAAGCCGCGCGGAGGAGCTGAG...CC      | 894  |
| EmDREB2 .seq  | ACCTTCACTCTCAGCTCTCTCTCTCTCTCTCTCTCTCTCTCTCTCTCTCTCTCTCT     | 234 | EmDREB2 .seq  | TTGTTGCGAGGCTCTCAAGCTTACCTTAAAGCCGCGCGGAGGAGCTGAG...CC      | 894  |
| Consensus     | ACCTTCACTCTCAGCTCTCTCTCTCTCTCTCTCTCTCTCTCTCTCTCTCTCTCTCT     |     | Consensus     | TTGTTGCGAGGCTCTCAAGCTTACCTTAAAGCCGCGCGGAGGAGCTGAG...CC      |      |
| AhDREB1 .seq  | CCCTTCTCTCTCTCTCTCTCTCTCTCTCTCTCTCTCTCTCTCTCTCTCTCTCTCTCT    | 286 | AhDREB1 .seq  | TTGTTGCGAGGCTCTCAAGCTTACCTTAAAGCCGCGCGGAGGAGCTGAG...CC      | 932  |
| AcDREB2A .seq | CCCTTCTCTCTCTCTCTCTCTCTCTCTCTCTCTCTCTCTCTCTCTCTCTCTCTCTCT    | 279 | AcDREB2A .seq | TTGTTGCGAGGCTCTCAAGCTTACCTTAAAGCCGCGCGGAGGAGCTGAG...CC      | 932  |
| AcDREB2B .seq | CCCTTCTCTCTCTCTCTCTCTCTCTCTCTCTCTCTCTCTCTCTCTCTCTCTCTCTCT    | 276 | AcDREB2B .seq | TTGTTGCGAGGCTCTCAAGCTTACCTTAAAGCCGCGCGGAGGAGCTGAG...CC      | 932  |
| GmDREB2 .seq  | CCCTTCTCTCTCTCTCTCTCTCTCTCTCTCTCTCTCTCTCTCTCTCTCTCTCTCTCT    | 278 | GmDREB2 .seq  | TTGTTGCGAGGCTCTCAAGCTTACCTTAAAGCCGCGCGGAGGAGCTGAG...CC      | 932  |
| OsDREB2 .seq  | CCCTTCTCTCTCTCTCTCTCTCTCTCTCTCTCTCTCTCTCTCTCTCTCTCTCTCTCT    | 270 | OsDREB2 .seq  | TTGTTGCGAGGCTCTCAAGCTTACCTTAAAGCCGCGCGGAGGAGCTGAG...CC      | 932  |
| SlDREB2 .seq  | CCCTTCTCTCTCTCTCTCTCTCTCTCTCTCTCTCTCTCTCTCTCTCTCTCTCTCTCT    | 291 | SlDREB2 .seq  | TTGTTGCGAGGCTCTCAAGCTTACCTTAAAGCCGCGCGGAGGAGCTGAG...CC      | 932  |
| EmDREB2 .seq  | CCCTTCTCTCTCTCTCTCTCTCTCTCTCTCTCTCTCTCTCTCTCTCTCTCTCTCTCT    | 293 | EmDREB2 .seq  | TTGTTGCGAGGCTCTCAAGCTTACCTTAAAGCCGCGCGGAGGAGCTGAG...CC      | 932  |
| Consensus     | CCCTTCTCTCTCTCTCTCTCTCTCTCTCTCTCTCTCTCTCTCTCTCTCTCTCTCTCT    |     | Consensus     | TTGTTGCGAGGCTCTCAAGCTTACCTTAAAGCCGCGCGGAGGAGCTGAG...CC      |      |
| AhDREB1 .seq  | ACCACTACTACTACTACTACTACTACTACTACTACTACTACTACTACTACTACTACTACT | 356 | AhDREB1 .seq  | TTGTTGCGAGGCTCTCAAGCTTACCTTAAAGCCGCGCGGAGGAGCTGAG...CC      | 989  |
| AcDREB2A .seq | ACCACTACTACTACTACTACTACTACTACTACTACTACTACTACTACTACTACTACTACT | 329 | AcDREB2A .seq | TTGTTGCGAGGCTCTCAAGCTTACCTTAAAGCCGCGCGGAGGAGCTGAG...CC      | 1008 |
| AcDREB2B .seq | ACCACTACTACTACTACTACTACTACTACTACTACTACTACTACTACTACTACTACTACT | 336 | AcDREB2B .seq | TTGTTGCGAGGCTCTCAAGCTTACCTTAAAGCCGCGCGGAGGAGCTGAG...CC      | 1008 |
| GmDREB2 .seq  | ACCACTACTACTACTACTACTACTACTACTACTACTACTACTACTACTACTACTACTACT | 327 | GmDREB2 .seq  | TTGTTGCGAGGCTCTCAAGCTTACCTTAAAGCCGCGCGGAGGAGCTGAG...CC      | 995  |
| OsDREB2 .seq  | ACCACTACTACTACTACTACTACTACTACTACTACTACTACTACTACTACTACTACTACT | 320 | OsDREB2 .seq  | TTGTTGCGAGGCTCTCAAGCTTACCTTAAAGCCGCGCGGAGGAGCTGAG...CC      | 995  |
| SlDREB2 .seq  | ACCACTACTACTACTACTACTACTACTACTACTACTACTACTACTACTACTACTACTACT | 351 | SlDREB2 .seq  | TTGTTGCGAGGCTCTCAAGCTTACCTTAAAGCCGCGCGGAGGAGCTGAG...CC      | 995  |
| EmDREB2 .seq  | ACCACTACTACTACTACTACTACTACTACTACTACTACTACTACTACTACTACTACTACT | 353 | EmDREB2 .seq  | TTGTTGCGAGGCTCTCAAGCTTACCTTAAAGCCGCGCGGAGGAGCTGAG...CC      | 995  |
| Consensus     | ACCACTACTACTACTACTACTACTACTACTACTACTACTACTACTACTACTACTACTACT |     | Consensus     | TTGTTGCGAGGCTCTCAAGCTTACCTTAAAGCCGCGCGGAGGAGCTGAG...CC      |      |
| AhDREB1 .seq  | GATCAATCAGATCCAGCCCAATACGATCCAGCCCAACCACTGGCAACACACACACT     | 416 | AhDREB1 .seq  | TTGTTGCGAGGCTCTCAAGCTTACCTTAAAGCCGCGCGGAGGAGCTGAG...CC      | 1029 |
| AcDREB2A .seq | GATCAATCAGATCCAGCCCAATACGATCCAGCCCAACCACTGGCAACACACACACT     | 396 | AcDREB2A .seq | TTGTTGCGAGGCTCTCAAGCTTACCTTAAAGCCGCGCGGAGGAGCTGAG...CC      | 1029 |
| AcDREB2B .seq | GATCAATCAGATCCAGCCCAATACGATCCAGCCCAACCACTGGCAACACACACACT     | 393 | AcDREB2B .seq | TTGTTGCGAGGCTCTCAAGCTTACCTTAAAGCCGCGCGGAGGAGCTGAG...CC      | 1029 |
| GmDREB2 .seq  | GATCAATCAGATCCAGCCCAATACGATCCAGCCCAACCACTGGCAACACACACACT     | 379 | GmDREB2 .seq  | TTGTTGCGAGGCTCTCAAGCTTACCTTAAAGCCGCGCGGAGGAGCTGAG...CC      | 993  |
| OsDREB2 .seq  | GATCAATCAGATCCAGCCCAATACGATCCAGCCCAACCACTGGCAACACACACACT     | 390 | OsDREB2 .seq  | TTGTTGCGAGGCTCTCAAGCTTACCTTAAAGCCGCGCGGAGGAGCTGAG...CC      | 993  |
| SlDREB2 .seq  | GATCAATCAGATCCAGCCCAATACGATCCAGCCCAACCACTGGCAACACACACACT     | 411 | SlDREB2 .seq  | TTGTTGCGAGGCTCTCAAGCTTACCTTAAAGCCGCGCGGAGGAGCTGAG...CC      | 993  |
| EmDREB2 .seq  | GATCAATCAGATCCAGCCCAATACGATCCAGCCCAACCACTGGCAACACACACACT     | 407 | EmDREB2 .seq  | TTGTTGCGAGGCTCTCAAGCTTACCTTAAAGCCGCGCGGAGGAGCTGAG...CC      | 993  |
| Consensus     | GATCAATCAGATCCAGCCCAATACGATCCAGCCCAACCACTGGCAACACACACACT     |     | Consensus     | TTGTTGCGAGGCTCTCAAGCTTACCTTAAAGCCGCGCGGAGGAGCTGAG...CC      |      |
| AhDREB1 .seq  | CACTCTCTCTCTCTCTCTCTCTCTCTCTCTCTCTCTCTCTCTCTCTCTCTCTCTCTCT   | 474 | AhDREB1 .seq  | TTGTTGCGAGGCTCTCAAGCTTACCTTAAAGCCGCGCGGAGGAGCTGAG...CC      | 1050 |
| AcDREB2A .seq | CACTCTCTCTCTCTCTCTCTCTCTCTCTCTCTCTCTCTCTCTCTCTCTCTCTCTCTCT   | 452 | AcDREB2A .seq | TTGTTGCGAGGCTCTCAAGCTTACCTTAAAGCCGCGCGGAGGAGCTGAG...CC      | 1008 |
| AcDREB2B .seq | CACTCTCTCTCTCTCTCTCTCTCTCTCTCTCTCTCTCTCTCTCTCTCTCTCTCTCTCT   | 449 | AcDREB2B .seq | TTGTTGCGAGGCTCTCAAGCTTACCTTAAAGCCGCGCGGAGGAGCTGAG...CC      | 993  |
| GmDREB2 .seq  | CACTCTCTCTCTCTCTCTCTCTCTCTCTCTCTCTCTCTCTCTCTCTCTCTCTCTCTCT   | 429 | GmDREB2 .seq  | TTGTTGCGAGGCTCTCAAGCTTACCTTAAAGCCGCGCGGAGGAGCTGAG...CC      | 993  |
| OsDREB2 .seq  | CACTCTCTCTCTCTCTCTCTCTCTCTCTCTCTCTCTCTCTCTCTCTCTCTCTCTCTCT   | 449 | OsDREB2 .seq  | TTGTTGCGAGGCTCTCAAGCTTACCTTAAAGCCGCGCGGAGGAGCTGAG...CC      | 993  |
| SlDREB2 .seq  | CACTCTCTCTCTCTCTCTCTCTCTCTCTCTCTCTCTCTCTCTCTCTCTCTCTCTCTCT   | 471 | SlDREB2 .seq  | TTGTTGCGAGGCTCTCAAGCTTACCTTAAAGCCGCGCGGAGGAGCTGAG...CC      | 993  |
| EmDREB2 .seq  | CACTCTCTCTCTCTCTCTCTCTCTCTCTCTCTCTCTCTCTCTCTCTCTCTCTCTCTCT   | 464 | EmDREB2 .seq  | TTGTTGCGAGGCTCTCAAGCTTACCTTAAAGCCGCGCGGAGGAGCTGAG...CC      | 993  |
| Consensus     | CACTCTCTCTCTCTCTCTCTCTCTCTCTCTCTCTCTCTCTCTCTCTCTCTCTCTCTCT   |     | Consensus     | TTGTTGCGAGGCTCTCAAGCTTACCTTAAAGCCGCGCGGAGGAGCTGAG...CC      |      |
| AhDREB1 .seq  | ACG...CTCTCTCTCTCTCTCTCTCTCTCTCTCTCTCTCTCTCTCTCTCTCTCTCTCTCT | 529 | AhDREB1 .seq  | TTGTTGCGAGGCTCTCAAGCTTACCTTAAAGCCGCGCGGAGGAGCTGAG...CC      | 1050 |
| AcDREB2A .seq | ACG...CTCTCTCTCTCTCTCTCTCTCTCTCTCTCTCTCTCTCTCTCTCTCTCTCTCTCT | 499 | AcDREB2A .seq | TTGTTGCGAGGCTCTCAAGCTTACCTTAAAGCCGCGCGGAGGAGCTGAG...CC      | 1008 |
| AcDREB2B .seq | ACG...CTCTCTCTCTCTCTCTCTCTCTCTCTCTCTCTCTCTCTCTCTCTCTCTCTCTCT | 508 | AcDREB2B .seq | TTGTTGCGAGGCTCTCAAGCTTACCTTAAAGCCGCGCGGAGGAGCTGAG...CC      | 993  |
| GmDREB2 .seq  | ACG...CTCTCTCTCTCTCTCTCTCTCTCTCTCTCTCTCTCTCTCTCTCTCTCTCTCTCT | 497 | GmDREB2 .seq  | TTGTTGCGAGGCTCTCAAGCTTACCTTAAAGCCGCGCGGAGGAGCTGAG...CC      | 993  |
| OsDREB2 .seq  | ACG...CTCTCTCTCTCTCTCTCTCTCTCTCTCTCTCTCTCTCTCTCTCTCTCTCTCTCT | 508 | OsDREB2 .seq  | TTGTTGCGAGGCTCTCAAGCTTACCTTAAAGCCGCGCGGAGGAGCTGAG...CC      | 993  |
| SlDREB2 .seq  | ACG...CTCTCTCTCTCTCTCTCTCTCTCTCTCTCTCTCTCTCTCTCTCTCTCTCTCTCT | 530 | SlDREB2 .seq  | TTGTTGCGAGGCTCTCAAGCTTACCTTAAAGCCGCGCGGAGGAGCTGAG...CC      | 993  |
| EmDREB2 .seq  | ACG...CTCTCTCTCTCTCTCTCTCTCTCTCTCTCTCTCTCTCTCTCTCTCTCTCTCTCT | 524 | EmDREB2 .seq  | TTGTTGCGAGGCTCTCAAGCTTACCTTAAAGCCGCGCGGAGGAGCTGAG...CC      | 993  |
| Consensus     | ACG...CTCTCTCTCTCTCTCTCTCTCTCTCTCTCTCTCTCTCTCTCTCTCTCTCTCTCT |     | Consensus     | TTGTTGCGAGGCTCTCAAGCTTACCTTAAAGCCGCGCGGAGGAGCTGAG...CC      |      |
| AhDREB1 .seq  | AGCGGCTGCTGAGCTGAGCAAGCCGACAGAGCTGACAGGCTCTCTCTCTCTCTCTCTCT  | 589 | AhDREB1 .seq  | TTGTTGCGAGGCTCTCAAGCTTACCTTAAAGCCGCGCGGAGGAGCTGAG...CC      | 1050 |
| AcDREB2A .seq | AGCGGCTGCTGAGCTGAGCAAGCCGACAGAGCTGACAGGCTCTCTCTCTCTCTCTCTCT  | 549 | AcDREB2A .seq | TTGTTGCGAGGCTCTCAAGCTTACCTTAAAGCCGCGCGGAGGAGCTGAG...CC      | 1008 |
| AcDREB2B .seq | AGCGGCTGCTGAGCTGAGCAAGCCGACAGAGCTGACAGGCTCTCTCTCTCTCTCTCTCT  | 567 | AcDREB2B .seq | TTGTTGCGAGGCTCTCAAGCTTACCTTAAAGCCGCGCGGAGGAGCTGAG...CC      | 993  |
| GmDREB2 .seq  | AGCGGCTGCTGAGCTGAGCAAGCCGACAGAGCTGACAGGCTCTCTCTCTCTCTCTCTCT  | 587 | GmDREB2 .seq  | TTGTTGCGAGGCTCTCAAGCTTACCTTAAAGCCGCGCGGAGGAGCTGAG...CC      | 993  |
| OsDREB2 .seq  | AGCGGCTGCTGAGCTGAGCAAGCCGACAGAGCTGACAGGCTCTCTCTCTCTCTCTCTCT  | 589 | OsDREB2 .seq  | TTGTTGCGAGGCTCTCAAGCTTACCTTAAAGCCGCGCGGAGGAGCTGAG...CC      | 993  |
| SlDREB2 .seq  | AGCGGCTGCTGAGCTGAGCAAGCCGACAGAGCTGACAGGCTCTCTCTCTCTCTCTCTCT  | 580 | SlDREB2 .seq  | TTGTTGCGAGGCTCTCAAGCTTACCTTAAAGCCGCGCGGAGGAGCTGAG...CC      | 993  |
| EmDREB2 .seq  | AGCGGCTGCTGAGCTGAGCAAGCCGACAGAGCTGACAGGCTCTCTCTCTCTCTCTCTCT  | 584 | EmDREB2 .seq  | TTGTTGCGAGGCTCTCAAGCTTACCTTAAAGCCGCGCGGAGGAGCTGAG...CC      | 993  |
| Consensus     | AGCGGCTGCTGAGCTGAGCAAGCCGACAGAGCTGACAGGCTCTCTCTCTCTCTCTCTCT  |     | Consensus     | TTGTTGCGAGGCTCTCAAGCTTACCTTAAAGCCGCGCGGAGGAGCTGAG...CC      |      |
| AhDREB1 .seq  | ACGAGAGAGAGCTCTCTCTCTCTCTCTCTCTCTCTCTCTCTCTCTCTCTCTCTCTCTCT  | 647 | AhDREB1 .seq  | TTGTTGCGAGGCTCTCAAGCTTACCTTAAAGCCGCGCGGAGGAGCTGAG...CC      | 1050 |
| AcDREB2A .seq | ACGAGAGAGAGCTCTCTCTCTCTCTCTCTCTCTCTCTCTCTCTCTCTCTCTCTCTCTCT  | 599 | AcDREB2A .seq | TTGTTGCGAGGCTCTCAAGCTTACCTTAAAGCCGCGCGGAGGAGCTGAG...CC      | 1008 |
| AcDREB2B .seq | ACGAGAGAGAGCTCTCTCTCTCTCTCTCTCTCTCTCTCTCTCTCTCTCTCTCTCTCTCT  | 626 | AcDREB2B .seq | TTGTTGCGAGGCTCTCAAGCTTACCTTAAAGCCGCGCGGAGGAGCTGAG...CC      | 993  |
| GmDREB2 .seq  | ACGAGAGAGAGCTCTCTCTCTCTCTCTCTCTCTCTCTCTCTCTCTCTCTCTCTCTCTCT  | 614 | GmDREB2 .seq  | TTGTTGCGAGGCTCTCAAGCTTACCTTAAAGCCGCGCGGAGGAGCTGAG...CC      | 993  |
| OsDREB2 .seq  | ACGAGAGAGAGCTCTCTCTCTCTCTCTCTCTCTCTCTCTCTCTCTCTCTCTCTCTCTCT  | 621 | OsDREB2 .seq  | TTGTTGCGAGGCTCTCAAGCTTACCTTAAAGCCGCGCGGAGGAGCTGAG...CC      | 993  |
| SlDREB2 .seq  | ACGAGAGAGAGCTCTCTCTCTCTCTCTCTCTCTCTCTCTCTCTCTCTCTCTCTCTCTCT  | 616 | SlDREB2 .seq  | TTGTTGCGAGGCTCTCAAGCTTACCTTAAAGCCGCGCGGAGGAGCTGAG...CC      | 993  |
| EmDREB2 .seq  | ACGAGAGAGAGCTCTCTCTCTCTCTCTCTCTCTCTCTCTCTCTCTCTCTCTCTCTCTCT  | 643 | EmDREB2 .seq  | TTGTTGCGAGGCTCTCAAGCTTACCTTAAAGCCGCGCGGAGGAGCTGAG...CC      | 993  |
| Consensus     | ACGAGAGAGAGCTCTCTCTCTCTCTCTCTCTCTCTCTCTCTCTCTCTCTCTCTCTCTCT  |     | Consensus     | TTGTTGCGAGGCTCTCAAGCTTACCTTAAAGCCGCGCGGAGGAGCTGAG...CC      |      |

Figure S1. Alignment of sequences of AhDREB1 with six DREB subfamily genes.

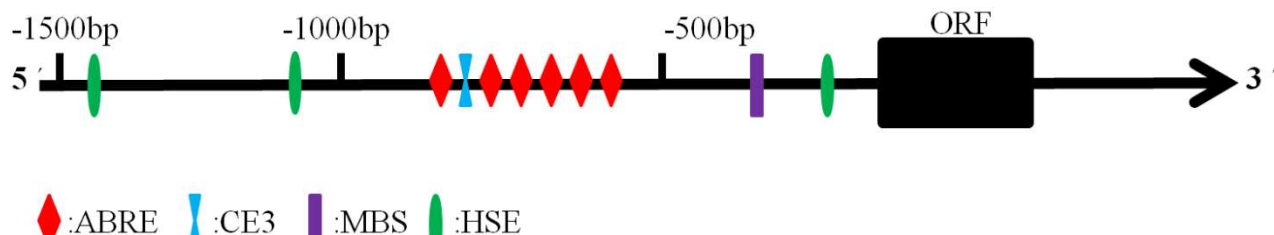

Figure S2. Analysis of cis-acting element of AhDREB1 promoter.

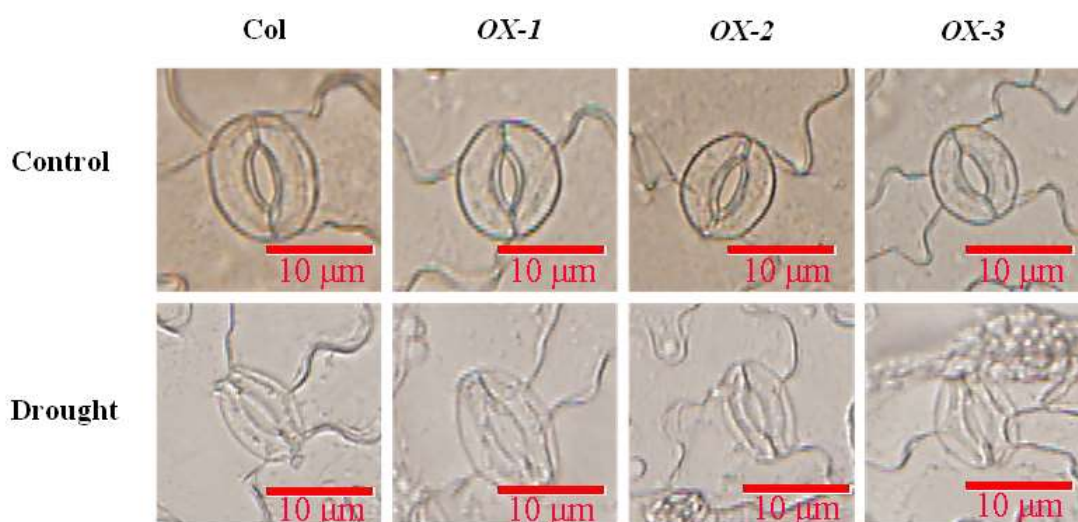

**Figure S3.** Images (bright-field microscopy) of stomatal apertures in the leaves of three-week-old *AhDREB1-OX* and Col plants under control or dehydration conditions.

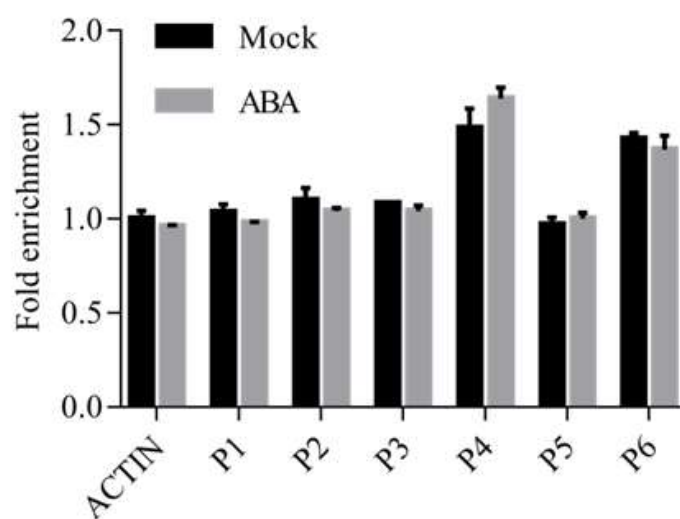

**Figure S4.** H3ac levels in chromatin of peanut leaves under 100 μM ABA treatment.

**Table S1.** Primers for RT-qPCR.

| <b>Genes</b>    | <b>Primers(5'- 3')</b>                                    |
|-----------------|-----------------------------------------------------------|
| <i>AhACTIN</i>  | F: GATTGGAATGGAAGCTGCTG<br>R: CGGTCAGCAATAACCAGGGAA       |
| <i>AtACTIN2</i> | F: GGTAACATTGTGCTCAGTGGTGG<br>R: AACGACCTTAATCTTCATGCTGC  |
| <i>AhAREB1</i>  | F: ACAAGGGAACCAGCATTAGG<br>R: TCACCACCACCATAACCAACCA      |
| <i>AhNCED1</i>  | F: TTACCTGTGGGATTGTTTGC<br>R: ACATGAGCCTCTACTTCTGC        |
| <i>AhDREB1</i>  | F: TGGCAAACACAGCACCTCAACTC<br>R: TCTGCCTCACCCCTCTGTAAAGC  |
| <i>AtRD29A</i>  | F: CAGGCGTAACAGGTAAACCTAGA<br>R: TCGGAAGACACGACAGGAAACAC  |
| <i>AtNCED3</i>  | F: TCGCAAGATTCGGGATTTTAGAC<br>R: TTTCTGGCTCTTCCCAAGCGTTC  |
| <i>AtP5CS1</i>  | F: AGAGCAATGGAGTCACTTTGTATG<br>R: CCTTGGCACAGTACTCATGGTTG |
| <i>AtP5CS2</i>  | F: ATTCTCCGCCAAGTGGACAGTG<br>R: CTCAGCACCAAGTCCGAACCTAA   |
| <i>AtPYL2</i>   | F: CCCGAGGGAAACACAGAGGAAGA<br>R: ATAGGTGCAGATGTGGCGGCAAC  |

---

|                  |                                                               |
|------------------|---------------------------------------------------------------|
| <i>AtPP2C5</i>   | F: CGACGACGGAGGTTACAAAAATG<br>R: TTGTTCCCTAGATTCATCGCAGC      |
| <i>AtSnRK2.2</i> | F: TGGTCTTGCGGTGTAACATTATATG<br>R:CGAGTATGTGACACTAAGGATTCTTTG |
| <i>AtSnRK2.4</i> | F: TGGCTGATGTATGGTCTTGTGGT<br>R: GTTTTCTGAAGTTCTTGGGGTC       |
| <i>AtAREB3</i>   | F: GAGGAGGGATAAGCAGCCTACAC<br>R: ACCACCAACAGGACCATCATGGT      |
| <i>AtABF4</i>    | F: CAAGGATGGTAATATGGAAGGTAG<br>R: GTGTCATTCCCCTAAAGTCTGT      |

---

**Table S2.** Primers for ChIP-qPCR.

| <b>Fragments</b> | <b>Primers(5'- 3')</b>                                    |
|------------------|-----------------------------------------------------------|
| <i>P1</i>        | F: CGGTTTGCTGCGTCTATTAG<br>R: CCATATCGATGCGCGTTTAC        |
| <i>P2</i>        | F: GAACAATGTTGACGAATCTAACCC<br>R: GCAATACTACGAGCTTCAATACC |
| <i>P3</i>        | F: TTCTTTTCCCCCTCTGTTACAC<br>R: ACTAAGCCTGGATCTCGATTCTG   |
| <i>P4</i>        | F: TGGCAAACACAGCACCTCAACTC<br>R: TCTGCCTCACCCCTCTGTAAAGC  |
| <i>P5</i>        | F: GCCCTTCATAGATCTCATT<br>R: ATAAAAGCCAGGTCAAGCAG         |
| <i>P6</i>        | F: GAACAATGTTGACGAATCTAACCC<br>R: GCAATACTACGAGCTTCAATACC |
| <i>AhACTIN</i>   | F: GATTGGAATGGAAGCTGCTG<br>R: CGGTCAGCAATACCAGGGAA        |
